# Supplementary material for: Organization and training at national level of antimicrobial stewardship and infection control activities in Europe: an ESCMID cross-sectional survey
Source: PubMed Central journal article supplement (PMC6800847; doi:10.1007/s10096-019-03648-2), 2019-08-08
Supplement: 10096_2019_3648_MOESM2_ESM.pdf [file 10096_2019_3648_MOESM2_ESM.pdf]

**eTable 1. Number of participants per country**

| Country                        | Number |
|--------------------------------|--------|
| Albania                        | 1      |
| Austria                        | 3      |
| Azerbaijan                     | 1      |
| Belgium                        | 3      |
| Bulgaria                       | 1      |
| Croatia                        | 3      |
| Czech Republic                 | 1      |
| Cyprus                         | 2      |
| Denmark                        | 2      |
| Estonia                        | 1      |
| Finland                        | 1      |
| France                         | 3      |
| Germany                        | 3      |
| Greece                         | 3      |
| Hungary                        | 3      |
| Ireland                        | 3      |
| Israel                         | 1      |
| Italy                          | 3      |
| Kosovo                         | 3      |
| Latvia                         | 3      |
| Lithuania                      | 2      |
| Luxembourg                     | 1      |
| Malta                          | 1      |
| Netherlands                    | 2      |
| Norway                         | 2      |
| Poland                         | 3      |
| Portugal                       | 3      |
| Republic of Northern Macedonia | 1      |
| Romania                        | 3      |
| Serbia                         | 1      |
| Slovakia                       | 1      |
| Slovenia                       | 2      |
| Spain                          | 3      |
| Sweden                         | 3      |
| Switzerland                    | 2      |
| Turkey                         | 3      |
| Ukraine                        | 1      |
| United Kingdom                 | 3      |

**eTable 2. Presence of national professional societies and trainee associations for Clinical Microbiology, Infectious Diseases, Infection Prevention and Control, and Clinical Pharmacy, in the 38 surveyed European countries**

| Country                        | National professional societies |    |     |    |        | Formal and/or informal trainee associations |               |               |               |
|--------------------------------|---------------------------------|----|-----|----|--------|---------------------------------------------|---------------|---------------|---------------|
|                                | CM                              | ID | IPC | CP | Other  | CM                                          | ID            | IPC           | CP            |
| Albania                        | X                               | X  |     |    |        | No                                          | Only informal | No            | No            |
| Austria                        |                                 | X  |     | X  | CM+IPC | Only informal                               | No            | No            | Both          |
| Azerbaijan                     | X                               |    |     |    |        | Yes, formal                                 | Yes, formal   | No            | No            |
| Belgium                        |                                 |    | X   | X  | CM+ID  | Yes, formal                                 | No            | No            | No            |
| Bulgaria                       | X                               | X  | X   | X  |        | No                                          | No            | No            | No            |
| Croatia                        | X                               | X  |     |    |        | No                                          | Both          | No            | Yes, formal   |
| Czech Republic                 | X                               | X  | X   |    |        | Both                                        | No            | No            | No            |
| Cyprus                         | X                               | X  | X   |    |        | Only informal                               | No            | Only informal | No            |
| Denmark                        | X                               | X  | X   | X  |        | No                                          | Only informal | No            | No            |
| Estonia                        |                                 | X  |     | X  |        | No                                          | No            | No            | No            |
| Finland                        | X                               | X  | X   |    |        | No                                          | Only informal | No            | No            |
| France                         | X                               | X  | X   | X  |        | Only informal                               | Both          | No            | No            |
| Germany                        |                                 | X  |     | X  | CM+IPC | No                                          | Both          | No            | No            |
| Greece                         | X                               | X  | X   |    |        | Only informal                               | Yes, formal   | Only informal | Only informal |
| Hungary                        |                                 |    | X   | X  | CM+ID  | Both                                        | Both          | Both          | Yes, formal   |
| Ireland                        | X                               | X  | X   | X  |        | Both                                        | Both          | Yes, formal   | Both          |
| Israel                         |                                 | X  |     |    |        | No                                          | Both          | Only informal | No            |
| Italy                          | X                               | X  | X   | X  |        | No                                          | No            | No            | No            |
| Kosovo                         | X                               | X  |     |    |        | No                                          | No            | No            | No            |
| Latvia                         |                                 | X  |     |    |        | No                                          | No            | No            | No            |
| Lithuania                      |                                 | X  |     | X  |        | No                                          | No            | No            | No            |
| Luxembourg                     |                                 | X  | X   | X  |        | Only informal                               | No            | No            | Both          |
| Malta                          |                                 |    |     | X  |        | Only informal                               | Only informal | No            | Both          |
| Netherlands                    | X                               |    | X   | X  |        | Both                                        | No            | No            | Yes, formal   |
| Norway                         | X                               | X  | X   | X  |        | No                                          | No            | No            | Only informal |
| Poland                         | X                               | X  |     |    |        | No                                          | No            | No            | No            |
| Portugal                       |                                 |    |     |    | CM+ID  | No                                          | No            | No            | No            |
| Republic of Northern Macedonia |                                 | X  | X   | X  |        | No                                          | Only informal | Only informal | No            |
| Romania                        | X                               | X  |     |    | CM+ID  | No                                          | No            | No            | Only informal |
| Serbia                         | X                               | X  |     |    |        | No                                          | No            | No            | No            |
| Slovakia                       |                                 | X  |     |    |        | Yes, formal                                 | Yes, formal   | No            | No            |
| Slovenia                       |                                 | X  |     |    |        | No                                          | Only informal | No            | No            |
| Spain                          |                                 |    | X   | X  | CM+ID  | No                                          | No            | No            | No            |
| Sweden                         | X                               | X  | X   | X  |        | Yes, formal                                 | Yes, formal   | Only informal | No            |
| Switzerland                    | X                               | X  | X   | X  |        | No                                          | No            | No            | No            |
| Turkey                         | X                               | X  | X   |    |        | Yes, formal                                 | Yes, formal   | No            | No            |
| Ukraine                        | X                               | X  | X   | X  |        | No                                          | Only informal | Yes, formal   | No            |
| United Kingdom                 | X                               | X  | X   | X  |        | Both                                        | Both          | Both          | Only informal |

CM, Clinical Microbiology; ID, Infectious Diseases; IPC, Infection Prevention and Control; CP, Clinical Pharmacy.

eTable 3. Web addresses of national societies of specialties involved in AMS/IPC activities

| Country                        |                                                                                                                                                                       | URL                                                                                                                                                       |                                                                                                                                                              |                                                                                               |                                                                                                                                                                                                                         |
|--------------------------------|-----------------------------------------------------------------------------------------------------------------------------------------------------------------------|-----------------------------------------------------------------------------------------------------------------------------------------------------------|--------------------------------------------------------------------------------------------------------------------------------------------------------------|-----------------------------------------------------------------------------------------------|-------------------------------------------------------------------------------------------------------------------------------------------------------------------------------------------------------------------------|
| Category                       | CM                                                                                                                                                                    | ID                                                                                                                                                        | IPC                                                                                                                                                          | CP                                                                                            | Other                                                                                                                                                                                                                   |
| Albania                        | NP                                                                                                                                                                    | www.shshi.al                                                                                                                                              | NP                                                                                                                                                           | NP                                                                                            |                                                                                                                                                                                                                         |
| Austria                        |                                                                                                                                                                       | http://www.oegit.eu                                                                                                                                       |                                                                                                                                                              | www.kh-pharmazie.at;<br>https://oephg.eu/                                                     | <a href="http://www.oegach.at">http://www.oegach.at</a><br><a href="http://www.oegkh.ac.at">http://www.oegkh.ac.at</a><br>(CM+IPC)                                                                                      |
| Azerbaijan                     | NP                                                                                                                                                                    | NP                                                                                                                                                        | NP                                                                                                                                                           | NP                                                                                            |                                                                                                                                                                                                                         |
| Belgium                        |                                                                                                                                                                       |                                                                                                                                                           | <a href="http://www.belgianinfectioncontrol.society.be/v2/home/startpage/">http://www.belgianinfectioncontrol.society.be/v2/home/startpage/</a>              | <a href="http://www.hospitalpharmacistbelgium.eu">http://www.hospitalpharmacistbelgium.eu</a> | <a href="http://www.bvikm.org/">http://www.bvikm.org/</a><br>(CM+ID)                                                                                                                                                    |
| Bulgaria                       | <a href="http://www.bam-bg.net">www.bam-bg.net</a>                                                                                                                    | <a href="http://bsid-bg.org/">http://bsid-bg.org/</a>                                                                                                     | <a href="http://www.bulnoso.org">www.bulnoso.org</a>                                                                                                         | NP                                                                                            |                                                                                                                                                                                                                         |
| Croatia                        | <a href="http://www.hdkm.hr">http://www.hdkm.hr</a>                                                                                                                   | <a href="http://hdib.hr">http://hdib.hr</a>                                                                                                               | NP                                                                                                                                                           | NP                                                                                            | <a href="http://www.iskra.bfm.hr">www.iskra.bfm.hr</a>                                                                                                                                                                  |
| Czech Republic                 | <a href="http://www.sem-cls.cz">www.sem-cls.cz</a>                                                                                                                    | <a href="http://www.infekce.cz">www.infekce.cz</a>                                                                                                        | <a href="http://www.sneh.cz">www.sneh.cz</a>                                                                                                                 | NP                                                                                            |                                                                                                                                                                                                                         |
| Cyprus                         | NP                                                                                                                                                                    | NP                                                                                                                                                        | NP                                                                                                                                                           | NP                                                                                            |                                                                                                                                                                                                                         |
| Denmark                        | <a href="http://www.dskm.dk">www.dskm.dk</a>                                                                                                                          | <a href="http://www.infemed.dk">www.infemed.dk</a>                                                                                                        | NP                                                                                                                                                           | NP                                                                                            |                                                                                                                                                                                                                         |
| Estonia                        | NP                                                                                                                                                                    | <a href="http://www.esid.com">www.esid.com</a>                                                                                                            | NP                                                                                                                                                           | NP                                                                                            |                                                                                                                                                                                                                         |
| Finland                        | <a href="https://kliinisetmikrobiologit.fi">https://kliinisetmikrobiologit.fi</a>                                                                                     | <a href="https://infektiolaakarit.yhdistysvain.fi">https://infektiolaakarit.yhdistysvain.fi</a>                                                           | <a href="http://www.sshy.fi">www.sshy.fi</a>                                                                                                                 | NP                                                                                            |                                                                                                                                                                                                                         |
| France                         | <a href="http://www.sfm-microbiologie.org">http://www.sfm-microbiologie.org</a>                                                                                       | <a href="http://www.infectiologie.com">http://www.infectiologie.com</a>                                                                                   | <a href="https://sf2h.net">https://sf2h.net</a>                                                                                                              | <a href="http://sfpc.eu/fr">http://sfpc.eu/fr</a>                                             |                                                                                                                                                                                                                         |
| Germany                        |                                                                                                                                                                       | <a href="http://www.dgi-net.de">www.dgi-net.de</a>                                                                                                        |                                                                                                                                                              | <a href="http://www.adka.de">www.adka.de</a>                                                  | <a href="http://www.dghm.org">www.dghm.org</a> (CM+IPC)<br><a href="http://www.antibiotic-stewardship.de">www.antibiotic-stewardship.de</a><br><a href="http://www.krankenhaushygiene.de">www.krankenhaushygiene.de</a> |
| Greece                         | <a href="https://hms.org.gr/en/">https://hms.org.gr/en/</a>                                                                                                           | <a href="http://www.loimoxeis.gr">www.loimoxeis.gr</a>                                                                                                    | <a href="http://www.eeel.gr">www.eeel.gr</a>                                                                                                                 | NP                                                                                            |                                                                                                                                                                                                                         |
| Hungary                        |                                                                                                                                                                       |                                                                                                                                                           | <a href="http://www.infekciokontroll.hu">www.infekciokontroll.hu</a>                                                                                         | <a href="https://www.mgyt-kgysz.hu/">https://www.mgyt-kgysz.hu/</a>                           | <a href="http://www.infektologia.hu">www.infektologia.hu</a><br>(CM+ID)                                                                                                                                                 |
| Ireland                        | <a href="http://www.iscm.ie/website/">http://www.iscm.ie/website/</a>                                                                                                 | <a href="https://www.idsociety.ie">https://www.idsociety.ie</a>                                                                                           | <a href="http://www.ipcireland.ie">www.ipcireland.ie</a>                                                                                                     | <a href="https://hpai.ie/">https://hpai.ie/</a>                                               | <a href="http://www.hpssc.ie/">http://www.hpssc.ie/</a>                                                                                                                                                                 |
| Israel                         | NP                                                                                                                                                                    | NP                                                                                                                                                        | NP                                                                                                                                                           | NP                                                                                            |                                                                                                                                                                                                                         |
| Italy                          | <a href="http://www.amcli.it/">http://www.amcli.it/</a>                                                                                                               | <a href="http://www.simit.org">http://www.simit.org</a>                                                                                                   | <a href="http://www.societaitalianaigiene.org">http://www.societaitalianaigiene.org</a>                                                                      | <a href="http://www.sifoweb.it">http://www.sifoweb.it</a>                                     | <a href="http://www.simplos.it">www.simplos.it</a>                                                                                                                                                                      |
| Kosovo                         | NP                                                                                                                                                                    | NP                                                                                                                                                        | NP                                                                                                                                                           | NP                                                                                            |                                                                                                                                                                                                                         |
| Latvia                         | NP                                                                                                                                                                    | NP                                                                                                                                                        | NP                                                                                                                                                           | NP                                                                                            |                                                                                                                                                                                                                         |
| Lithuania                      | NP                                                                                                                                                                    | <a href="https://www.lid.lt/">https://www.lid.lt/</a>                                                                                                     | NP                                                                                                                                                           | <a href="https://www.lkfd.lt/">https://www.lkfd.lt/</a>                                       |                                                                                                                                                                                                                         |
| Luxembourg                     | NP                                                                                                                                                                    | NP                                                                                                                                                        | NP                                                                                                                                                           | NP                                                                                            | <a href="http://www.conseil-scientifique.lu">www.conseil-scientifique.lu</a>                                                                                                                                            |
| Malta                          | NP                                                                                                                                                                    | NP                                                                                                                                                        | NP                                                                                                                                                           | <a href="http://www.mahp.org.mt">http://www.mahp.org.mt</a>                                   |                                                                                                                                                                                                                         |
| Netherlands                    | <a href="https://www.nvmm.nl/">https://www.nvmm.nl/</a>                                                                                                               | <a href="http://www.infectieziekten.org">www.infectieziekten.org</a>                                                                                      | <a href="https://www.vhig.nl/">https://www.vhig.nl/</a>                                                                                                      | <a href="https://nvza.nl/">https://nvza.nl/</a>                                               | <a href="https://www.rivm.nl/">https://www.rivm.nl/</a>                                                                                                                                                                 |
| Norway                         | <a href="https://legeforeningen.no/Fagmed/Norsk-forening-for-medisinsk-mikrobiologi/">https://legeforeningen.no/Fagmed/Norsk-forening-for-medisinsk-mikrobiologi/</a> | <a href="http://legeforeningen.no/Fagmed/Norsk-forening-for-infeksjonsmedisin/">http://legeforeningen.no/Fagmed/Norsk-forening-for-infeksjonsmedisin/</a> | <a href="http://www.smittevernforum.no/">http://www.smittevernforum.no/</a>                                                                                  | <a href="http://www.sykehusfarmasi.org">www.sykehusfarmasi.org</a>                            |                                                                                                                                                                                                                         |
| Poland                         | <a href="http://www.microbiology.pl">http://www.microbiology.pl</a>                                                                                                   | NP                                                                                                                                                        | NP                                                                                                                                                           | NP                                                                                            | <a href="http://www.antybiotyki.edu.pl">http://www.antybiotyki.edu.pl</a>                                                                                                                                               |
| Portugal                       |                                                                                                                                                                       |                                                                                                                                                           | <a href="https://www.dgs.pt/">https://www.dgs.pt/</a>                                                                                                        | NP                                                                                            | <a href="http://spdmc.org">http://spdmc.org</a><br>(CM+ID)                                                                                                                                                              |
| Republic of Northern Macedonia | NP                                                                                                                                                                    | <a href="http://www.infektivnaklinika.mk/Zdruzenie/Zazdruzenieto.htm">http://www.infektivnaklinika.mk/Zdruzenie/Zazdruzenieto.htm</a>                     | <a href="http://www.mzkihi.mk/index-en">http://www.mzkihi.mk/index-en</a>                                                                                    | <a href="http://www.mfd.org.mk">http://www.mfd.org.mk</a>                                     |                                                                                                                                                                                                                         |
| Romania                        | <a href="http://www.srm.ro">http://www.srm.ro</a>                                                                                                                     | <a href="http://www.infectiologie.ro">http://www.infectiologie.ro</a>                                                                                     | <a href="http://www.srepi.ro">http://www.srepi.ro</a>                                                                                                        | NP                                                                                            |                                                                                                                                                                                                                         |
| Serbia                         | <a href="http://www.mikrobiologija.org">http://www.mikrobiologija.org</a>                                                                                             | NP                                                                                                                                                        | NP                                                                                                                                                           | NP                                                                                            |                                                                                                                                                                                                                         |
| Slovakia                       | NP                                                                                                                                                                    | <a href="https://www.infektologia.sk">https://www.infektologia.sk</a>                                                                                     | NP                                                                                                                                                           | NP                                                                                            |                                                                                                                                                                                                                         |
| Slovenia                       | <a href="http://www.imi.si">http://www.imi.si</a>                                                                                                                     | <a href="http://www.szdsi.si">http://www.szdsi.si</a>                                                                                                     | NP                                                                                                                                                           | <a href="http://www.sfd.si">http://www.sfd.si</a>                                             | <a href="http://www.szpz.info">http://www.szpz.info</a>                                                                                                                                                                 |
| Spain                          |                                                                                                                                                                       |                                                                                                                                                           | <a href="http://www.seimc.org">http://www.seimc.org</a><br><a href="http://www.seimc.org">http://www.seimc.org</a>                                           | <a href="https://www.sefh.es">https://www.sefh.es</a>                                         | <a href="http://www.seimc.org">www.seimc.org</a><br>(CM+ID)                                                                                                                                                             |
| Sweden                         | <a href="http://www.mikrobiologi.net">http://www.mikrobiologi.net</a>                                                                                                 | <a href="http://www.infektion.net">www.infektion.net</a>                                                                                                  | <a href="https://sfvh.se/">https://sfvh.se/</a><br><a href="https://slf.se/svenska-hygienlakarforeningen/">https://slf.se/svenska-hygienlakarforeningen/</a> | <a href="https://www.apotekarsocieteten.se">https://www.apotekarsocieteten.se</a>             |                                                                                                                                                                                                                         |
| Switzerland                    | <a href="https://www.swissmicrobiology.ch">https://www.swissmicrobiology.ch</a>                                                                                       | <a href="http://www.sginf.ch">http://www.sginf.ch</a>                                                                                                     | <a href="https://www.sgsh.ch">https://www.sgsh.ch</a>                                                                                                        | NP                                                                                            |                                                                                                                                                                                                                         |
| Turkey                         | <a href="https://www.klimud.org">https://www.klimud.org</a>                                                                                                           | <a href="http://www.enfeksiyon.org.tr">http://www.enfeksiyon.org.tr</a>                                                                                   | <a href="http://www.hider.org.tr">http://www.hider.org.tr</a>                                                                                                | NP                                                                                            | <a href="https://www.klimik.org.tr">https://www.klimik.org.tr</a><br>(CM+ID)                                                                                                                                            |

|                |                                                                               |                                                                                 |                                                                                                                                                      |                                                                           |                                                                                                                       |
|----------------|-------------------------------------------------------------------------------|---------------------------------------------------------------------------------|------------------------------------------------------------------------------------------------------------------------------------------------------|---------------------------------------------------------------------------|-----------------------------------------------------------------------------------------------------------------------|
| Ukraine        | NP                                                                            | NP                                                                              | <a href="http://www.infectioncontrol.org.ua">http://www.infectioncontrol.org.ua</a>                                                                  |                                                                           |                                                                                                                       |
| United Kingdom | <a href="https://microbiologysociety.org">https://microbiologysociety.org</a> | <a href="https://www.britishinfection.org">https://www.britishinfection.org</a> | <a href="http://www.infectioncontrol.org.ua">http://www.infectioncontrol.org.ua</a> ;<br><a href="https://www.ips.uk.net">https://www.ips.uk.net</a> | <a href="http://ukclinicalpharmacy.org">http://ukclinicalpharmacy.org</a> | <a href="http://www.bsac.org.uk">www.bsac.org.uk</a> ;<br><a href="https://www.his.org.uk">https://www.his.org.uk</a> |

AMS, Antimicrobial Stewardship; IPC, Infection Prevention and Control; URL, Uniform Resource Locator; CM, Clinical Microbiology; ID, Infectious Diseases; CP, Clinical Pharmacy; NP, not provided (or absent)

eTable 4. Organization of CM/ID/IPC specialties (official university track) across Europe

| Country                              | General<br>CM and<br>ID as<br>separated<br>specialties | Clinical Microbiology |                          |                            |                                                             | Infectious Diseases  |                          |                            |                                                             | Infection Prevention and Control  |                          |                            |                                                             |                                                            |
|--------------------------------------|--------------------------------------------------------|-----------------------|--------------------------|----------------------------|-------------------------------------------------------------|----------------------|--------------------------|----------------------------|-------------------------------------------------------------|-----------------------------------|--------------------------|----------------------------|-------------------------------------------------------------|------------------------------------------------------------|
|                                      |                                                        | Type of<br>specialty  | Open<br>only<br>to<br>MD | Years<br>of PG<br>training | Mandatory<br>clinical<br>rotations<br>during PG<br>training | Type of<br>specialty | Open<br>only<br>to<br>MD | Years<br>of PG<br>training | Mandatory<br>clinical<br>rotations<br>during PG<br>training | Type of<br>specialty <sup>a</sup> | Open<br>only<br>to<br>MD | Years<br>of PG<br>training | Mandatory<br>clinical<br>rotations<br>during PG<br>training | Possibility<br>for nurses<br>to<br>specialize<br>in<br>IPC |
| Albania                              | Yes                                                    | SA                    | Yes                      | 4                          | NP                                                          | SA                   | Yes                      | 4                          | Yes                                                         | NA                                | NA                       | NA                         | NA                                                          | No                                                         |
| Austria                              | Yes                                                    | SA                    | Yes                      | 6                          | Yes                                                         | SB                   | Yes                      | 6                          | Yes                                                         | SA                                | Yes                      | 6                          | Yes                                                         | Yes                                                        |
| Azerbaijan                           | Yes                                                    | SB                    | Yes                      | 2                          | Yes                                                         | SB                   | Yes                      | 4                          | Yes                                                         | SA                                | Yes                      | NP                         | No                                                          | No                                                         |
| Belgium                              | Yes                                                    | SB                    | No                       | 5                          | Yes                                                         | SB                   | Yes                      | 5                          | Yes                                                         | SB                                | No                       | 1                          | Yes                                                         | Yes                                                        |
| Bulgaria                             | Yes                                                    | SA                    | Yes                      | 4                          | Yes                                                         | SA                   | Yes                      | 4                          | Yes                                                         | SB                                | No                       | 2                          | Yes                                                         | Yes                                                        |
| Croatia                              | Yes                                                    | SA                    | Yes                      | 5                          | Yes                                                         | SA                   | Yes                      | 5                          | Yes                                                         | SB                                | Yes                      | NP                         | Yes                                                         | Yes                                                        |
| Czech Republic                       | Yes                                                    | SA                    | No                       | 5                          | Yes                                                         | SA                   | Yes                      | 4                          | Yes                                                         | SA                                | No                       | 4                          | Yes                                                         | Yes                                                        |
| Cyprus                               | Yes                                                    | SB                    | Yes                      | 5                          | Yes                                                         | SB                   | Yes                      | 7                          | Yes                                                         | NA                                | NA                       | NA                         | NA                                                          | Yes                                                        |
| Denmark                              | Yes                                                    | SA                    | Yes                      | 6                          | Yes                                                         | SA                   | Yes                      | 6                          | Yes                                                         | NA                                | NA                       | NA                         | NA                                                          | Yes                                                        |
| Estonia                              | Yes                                                    | SB                    | Yes                      | 4                          | Yes                                                         | SA                   | Yes                      | 4                          | Yes                                                         | Other                             | Yes                      | 4                          | NA                                                          | No                                                         |
| Finland                              | Yes                                                    | SA                    | No                       | 5                          | Yes                                                         | SA                   | Yes                      | 6                          | Yes                                                         | Other                             | Yes                      | 4                          | Yes                                                         | Yes                                                        |
| France                               | Yes                                                    | SB                    | No                       | 4                          | Yes                                                         | SA                   | Yes                      | 5                          | Yes                                                         | Other                             | No                       | 5                          | Yes                                                         | No                                                         |
| Germany                              | Yes                                                    | SA                    | Yes                      | 5                          | Yes                                                         | SB                   | Yes                      | 7                          | Yes                                                         | SB                                | Yes                      | 5                          | Yes                                                         | Yes                                                        |
| Greece                               | Yes                                                    | SB                    | Yes                      | 2                          | Yes                                                         | SB                   | Yes                      | 2                          | Yes                                                         | NA                                | NA                       | NA                         | NA                                                          | Yes                                                        |
| Hungary                              | Yes                                                    | SA                    | No                       | 5                          | Yes                                                         | SA                   | Yes                      | 5                          | Yes                                                         | SA                                | No                       | 4                          | Yes                                                         | Yes                                                        |
| Ireland                              | Yes                                                    | SA                    | Yes                      | 8                          | Yes                                                         | SB                   | Yes                      | 9                          | Yes                                                         | NA                                | NA                       | NA                         | NA                                                          | Yes                                                        |
| Israel                               | Yes                                                    | SB                    | Yes                      | 6                          | Yes                                                         | SB                   | Yes                      | 6                          | Yes                                                         | NA                                | NA                       | NA                         | NA                                                          | Yes                                                        |
| Italy                                | Yes                                                    | SA                    | No                       | 4                          | Yes                                                         | SA                   | Yes                      | 4                          | Yes                                                         | NA                                | NA                       | NA                         | NA                                                          | Yes                                                        |
| Kosovo                               | Yes                                                    | SA                    | Yes                      | 4                          | Yes                                                         | SA                   | Yes                      | 5                          | Yes                                                         | NA                                | NA                       | NA                         | NA                                                          | No                                                         |
| Latvia                               | NA                                                     | NA                    | NA                       | NA                         | NA                                                          | SA                   | Yes                      | 5                          | Yes                                                         | NA                                | NA                       | NA                         | NA                                                          | No                                                         |
| Lithuania                            | Yes                                                    | SB                    | No                       | 4                          | Yes                                                         | SA                   | Yes                      | 4                          | Yes                                                         | NA                                | NA                       | NA                         | NA                                                          | No                                                         |
| Luxembourg                           | Yes                                                    | SB                    | No                       | NP                         | NP                                                          | SB                   | Yes                      | NP                         | NP                                                          | NA                                | NA                       | NA                         | NP                                                          | No                                                         |
| Malta                                | Yes                                                    | SA                    | Yes                      | 5                          | Yes                                                         | SB                   | Yes                      | 5                          | Yes                                                         | SB                                | Yes                      | 5                          | Yes                                                         | Yes                                                        |
| Netherlands                          | Yes                                                    | SA                    | Yes                      | 5                          | No                                                          | SB                   | Yes                      | 6                          | Yes                                                         | NA                                | NA                       | NA                         | NA                                                          | Yes                                                        |
| Norway                               | Yes                                                    | SA                    | Yes                      | 5                          | Yes                                                         | SB                   | Yes                      | 7                          | Yes                                                         | NA                                | NA                       | NA                         | NA                                                          | Yes                                                        |
| Poland                               | Yes                                                    | SA                    | Yes                      | 4                          | Yes                                                         | SA                   | Yes                      | 5                          | Yes                                                         | NA                                | NA                       | NA                         | NA                                                          | Yes                                                        |
| Portugal                             | Yes                                                    | NA                    | NA                       | NA                         | NA                                                          | SA                   | Yes                      | 5                          | Yes                                                         | NA                                | NA                       | NA                         | NA                                                          | No                                                         |
| Republic of<br>Northern<br>Macedonia | Yes                                                    | SB                    | Yes                      | NP                         | Yes                                                         | SB                   | Yes                      | NP                         | Yes                                                         | NA                                | NA                       | NA                         | NA                                                          | Yes                                                        |
| Romania                              | Yes                                                    | SA                    | Yes                      | 4                          | Yes                                                         | SA                   | Yes                      | 5                          | Yes                                                         | NA                                | NA                       | NA                         | NA                                                          | Yes                                                        |
| Serbia                               | Yes                                                    | SA                    | Yes                      | 4                          | Yes                                                         | SA                   | Yes                      | 4                          | Yes                                                         | SA                                | No                       | 3                          | Yes                                                         | No                                                         |
| Slovakia                             | Yes                                                    | SA                    | No                       | 4                          | Yes                                                         | SA                   | Yes                      | 4                          | Yes                                                         | NA                                | NA                       | NA                         | NA                                                          | No                                                         |
| Slovenia                             | Yes                                                    | SA                    | Yes                      | 5                          | Yes                                                         | SA                   | Yes                      | 6                          | Yes                                                         | NA                                | NA                       | NA                         | NA                                                          | Yes                                                        |
| Spain                                | NA                                                     | SA                    | No                       | 4                          | Yes                                                         | NA                   | NA                       | NA                         | NA                                                          | SA                                | Yes                      | 4                          | Yes                                                         | No                                                         |
| Sweden                               | Yes                                                    | SA                    | Yes                      | 5                          | Yes                                                         | SA                   | Yes                      | 5                          | Yes                                                         | SA                                | Yes                      | 8                          | Yes                                                         | Yes                                                        |
| Switzerland                          | Yes                                                    | SA                    | No                       | 4                          | No                                                          | SA                   | Yes                      | 6                          | Yes                                                         | NA                                | NA                       | NA                         | NA                                                          | Yes                                                        |
| Turkey                               | No                                                     | SA                    | Yes                      | 5                          | Yes                                                         | SA                   | Yes                      | 5                          | Yes                                                         | NA                                | NA                       | NA                         | NA                                                          | Yes                                                        |
| Ukraine                              | Yes                                                    | SA                    | No                       | NP                         | No                                                          | SA                   | No                       | NP                         | No                                                          | NA                                | NA                       | NA                         | NA                                                          | Yes                                                        |
| United Kingdom                       | No                                                     | SA                    | Yes                      | 9                          | Yes                                                         | SB                   | Yes                      | 9                          | Yes                                                         | NA                                | NA                       | NA                         | NA                                                          | Yes                                                        |

<sup>a</sup> Question only referring to medical doctors.

CM, Clinical Microbiology; ID, Infectious Diseases; IPC, Infection Prevention and Control; SA, stand-alone; SB, sub-specialty; MD, medical doctor; PG, postgraduate; NA, not applicable; NP, answer not provided/I do not know; Other, no acknowledgment as official specialty/sub-specialty, but existence of specific courses that allow some people to act as IPC professionals.

eTable 5. Organization of AMS/IPC hospital activities at national level across Europe

| Country                        | Collaboration                                         |                                                        | AMS programmes                                          |                                            |                                                                                        | IPC programmes                                          |                                            |                                                                                        |
|--------------------------------|-------------------------------------------------------|--------------------------------------------------------|---------------------------------------------------------|--------------------------------------------|----------------------------------------------------------------------------------------|---------------------------------------------------------|--------------------------------------------|----------------------------------------------------------------------------------------|
|                                | AMS and IPC activities under the same dpt/team/leader | Routine interactions between IPC and AMS professionals | National guidance or requirements on AMS implementation | Nationals staffing standards for AMS teams | National requirements for formal PG training to become an AMS team member <sup>a</sup> | National guidance or requirements on IPC implementation | Nationals staffing standards for IPC teams | National requirements for formal PG training to become an IPC team member <sup>a</sup> |
| Albania                        | Yes                                                   | NA                                                     | No                                                      | No                                         | No                                                                                     | No                                                      | No                                         | No                                                                                     |
| Austria                        | No                                                    | Yes                                                    | Only guidance                                           | No                                         | No                                                                                     | Yes, both                                               | Yes                                        | Yes                                                                                    |
| Azerbaijan                     | No                                                    | No                                                     | Only guidance                                           | No                                         | No                                                                                     | Only guidance                                           | No                                         | Yes                                                                                    |
| Belgium                        | No                                                    | Yes                                                    | Yes, both                                               | Yes                                        | No                                                                                     | Yes, both                                               | Yes                                        | Yes                                                                                    |
| Bulgaria                       | Yes                                                   | Yes                                                    | Only guidance                                           | No                                         | Yes                                                                                    | Yes, both                                               | Yes                                        | Yes                                                                                    |
| Croatia                        | Yes                                                   | Yes                                                    | No                                                      | No                                         | No                                                                                     | Yes, both                                               | Yes                                        | Yes                                                                                    |
| Czech Republic                 | No                                                    | Yes                                                    | Only guidance                                           | NP                                         | No                                                                                     | Yes, both                                               | Yes                                        | Yes                                                                                    |
| Cyprus                         | No                                                    | NA                                                     | No                                                      | No                                         | No                                                                                     | Only guidance                                           | Yes                                        | No                                                                                     |
| Denmark                        | No                                                    | NA                                                     | Yes, both                                               | No                                         | No                                                                                     | Yes, both                                               | No                                         | No                                                                                     |
| Estonia                        | Yes                                                   | NA                                                     | No                                                      | No                                         | No                                                                                     | No                                                      | No                                         | No                                                                                     |
| Finland                        | Yes                                                   | Yes                                                    | Only guidance                                           | Yes                                        | No                                                                                     | Yes, both                                               | Yes                                        | No                                                                                     |
| France                         | No                                                    | Yes                                                    | Only requirements                                       | Yes                                        | Yes                                                                                    | Only guidance                                           | Yes                                        | Yes                                                                                    |
| Germany                        | No                                                    | Yes                                                    | Only guidance                                           | Yes                                        | No                                                                                     | Yes, both                                               | Yes                                        | Yes                                                                                    |
| Greece                         | Yes                                                   | Yes                                                    | Only guidance                                           | No                                         | No                                                                                     | Only guidance                                           | Yes                                        | No                                                                                     |
| Hungary                        | Yes                                                   | Yes                                                    | Only guidance                                           | Yes                                        | No                                                                                     | Yes, both                                               | Yes                                        | Yes                                                                                    |
| Ireland                        | Yes                                                   | Yes                                                    | Yes, both                                               | Yes                                        | No                                                                                     | Yes, both                                               | Yes                                        | No                                                                                     |
| Israel                         | No                                                    | Yes                                                    | Yes, both                                               | No                                         | No                                                                                     | Yes, both                                               | Yes                                        | No                                                                                     |
| Italy                          | No                                                    | Yes                                                    | Only guidance                                           | No                                         | No                                                                                     | Only guidance                                           | No                                         | No                                                                                     |
| Kosovo                         | No                                                    | No                                                     | Only guidance                                           | No                                         | No                                                                                     | Yes, both                                               | Yes                                        | No                                                                                     |
| Latvia                         | Yes                                                   | NA                                                     | No                                                      | Yes                                        | No                                                                                     | Yes, both                                               | Yes                                        | No                                                                                     |
| Lithuania                      | No                                                    | Yes                                                    | No                                                      | No                                         | No                                                                                     | Yes, both                                               | Yes                                        | No                                                                                     |
| Luxembourg                     | Yes                                                   | Yes                                                    | Only guidance                                           | No                                         | No                                                                                     | Yes, both                                               | No                                         | No                                                                                     |
| Malta                          | Yes                                                   | Yes                                                    | No                                                      | No                                         | No                                                                                     | Only guidance                                           | No                                         | Yes                                                                                    |
| Netherlands                    | No                                                    | Yes                                                    | Yes, both                                               | Yes                                        | No                                                                                     | Yes, both                                               | Yes                                        | No                                                                                     |
| Norway                         | Yes                                                   | Yes                                                    | Yes, both                                               | No                                         | No                                                                                     | Only guidance                                           | No                                         | No                                                                                     |
| Poland                         | Yes                                                   | Yes                                                    | Yes, both                                               | No                                         | No                                                                                     | No                                                      | Yes                                        | No                                                                                     |
| Portugal                       | Yes                                                   | Yes                                                    | Only guidance                                           | No                                         | No                                                                                     | Only guidance                                           | Yes                                        | No                                                                                     |
| Republic of Northern Macedonia | Yes                                                   | Yes                                                    | Yes, both                                               | No                                         | No                                                                                     | Yes, both                                               | No                                         | No                                                                                     |
| Romania                        | No                                                    | No                                                     | No                                                      | No                                         | No                                                                                     | Yes, both                                               | Yes                                        | No                                                                                     |
| Serbia                         | Yes                                                   | Yes                                                    | Only guidance                                           | Yes                                        | No                                                                                     | Only guidance                                           | Yes                                        | Yes                                                                                    |
| Slovakia                       | No                                                    | NA                                                     | NP                                                      | No                                         | No                                                                                     | NP                                                      | No                                         | No                                                                                     |
| Slovenia                       | No                                                    | Yes                                                    | Yes, both                                               | No                                         | No                                                                                     | Yes, both                                               | Yes                                        | No                                                                                     |
| Spain                          | No                                                    | Yes                                                    | Yes, both                                               | No                                         | No                                                                                     | No                                                      | No                                         | Yes                                                                                    |
| Sweden                         | No                                                    | NA                                                     | Only guidance                                           | No                                         | No                                                                                     | Yes, both                                               | No                                         | Yes                                                                                    |
| Switzerland                    | Yes                                                   | Yes                                                    | Only guidance                                           | No                                         | No                                                                                     | No                                                      | No                                         | No                                                                                     |
| Turkey                         | Yes                                                   | Yes                                                    | Only guidance                                           | No                                         | No                                                                                     | Yes, both                                               | Yes                                        | No                                                                                     |
| Ukraine                        | NP                                                    | Yes                                                    | Yes, both                                               | No                                         | Yes                                                                                    | Yes, both                                               | NP                                         | NP                                                                                     |
| United Kingdom                 | Yes                                                   | Yes                                                    | Yes, both                                               | No                                         | No                                                                                     | Yes, both                                               | Yes                                        | No                                                                                     |

<sup>a</sup> Question only referring to medical doctors.

AMS, Antimicrobial Stewardship; IPC, Infection Prevention and Control; DPT, department; Only PG, postgraduate; NA, not applicable; NP, answer not provided/I do not know.

eTable 6. Web links to national guidance and requirements documents on AMS implementations in hospitals

| Country                        | URL                                                                                                                                                                                                                                                                                                                                                                                                                                                                                                                                                                                                                                                                                                                                                                                                                                                                                                                                                          |
|--------------------------------|--------------------------------------------------------------------------------------------------------------------------------------------------------------------------------------------------------------------------------------------------------------------------------------------------------------------------------------------------------------------------------------------------------------------------------------------------------------------------------------------------------------------------------------------------------------------------------------------------------------------------------------------------------------------------------------------------------------------------------------------------------------------------------------------------------------------------------------------------------------------------------------------------------------------------------------------------------------|
| Albania                        | Documents under development                                                                                                                                                                                                                                                                                                                                                                                                                                                                                                                                                                                                                                                                                                                                                                                                                                                                                                                                  |
| Austria                        | Documents under development                                                                                                                                                                                                                                                                                                                                                                                                                                                                                                                                                                                                                                                                                                                                                                                                                                                                                                                                  |
| Azerbaijan                     | NP                                                                                                                                                                                                                                                                                                                                                                                                                                                                                                                                                                                                                                                                                                                                                                                                                                                                                                                                                           |
| Belgium                        | <a href="http://overlegorganen.gezondheid.belgie.be/sites/default/files/documents/nationale_raad_voor_ziekenhuisvoorzieningen/2007_01_11_-_nrzv_d_286-2_nl.pdf">http://overlegorganen.gezondheid.belgie.be/sites/default/files/documents/nationale_raad_voor_ziekenhuisvoorzieningen/2007_01_11_-_nrzv_d_286-2_nl.pdf</a> ;<br><a href="http://consultativebodies.health.belgium.be/sites/default/files/documents/2012_guide_belge_traitement_anti_infectieux_pratique_ambulatoire_antibioticagids_fr.pdf">http://consultativebodies.health.belgium.be/sites/default/files/documents/2012_guide_belge_traitement_anti_infectieux_pratique_ambulatoire_antibioticagids_fr.pdf</a> <a href="http://organesdeconcertation.sante.belgique.be/sites/default/files/documents/bapcoc_guidelineshospi_2017_sbimc-bvikm_fr_v1.pdf">http://organesdeconcertation.sante.belgique.be/sites/default/files/documents/bapcoc_guidelineshospi_2017_sbimc-bvikm_fr_v1.pdf</a> |
| Bulgaria                       | Documents under development                                                                                                                                                                                                                                                                                                                                                                                                                                                                                                                                                                                                                                                                                                                                                                                                                                                                                                                                  |
| Croatia                        | Documents under development                                                                                                                                                                                                                                                                                                                                                                                                                                                                                                                                                                                                                                                                                                                                                                                                                                                                                                                                  |
| Czech Republic                 | <a href="http://www.szu.cz/narodni-antibioticky-program">http://www.szu.cz/narodni-antibioticky-program</a>                                                                                                                                                                                                                                                                                                                                                                                                                                                                                                                                                                                                                                                                                                                                                                                                                                                  |
| Cyprus                         | NP                                                                                                                                                                                                                                                                                                                                                                                                                                                                                                                                                                                                                                                                                                                                                                                                                                                                                                                                                           |
| Denmark                        | <a href="https://sum.dk/~media/Filer%20-%20Publikationer_i_pdf/2017/Antibiotika-handlingsplan-frem-mod-2020/DK-Handlingsplan-05072017.pdf">https://sum.dk/~media/Filer%20-%20Publikationer_i_pdf/2017/Antibiotika-handlingsplan-frem-mod-2020/DK-Handlingsplan-05072017.pdf</a>                                                                                                                                                                                                                                                                                                                                                                                                                                                                                                                                                                                                                                                                              |
| Estonia                        | NP                                                                                                                                                                                                                                                                                                                                                                                                                                                                                                                                                                                                                                                                                                                                                                                                                                                                                                                                                           |
| Finland                        | <a href="https://stm.fi/julkaisu?pubid=URN:ISBN:978-952-00-3955-4">https://stm.fi/julkaisu?pubid=URN:ISBN:978-952-00-3955-4</a>                                                                                                                                                                                                                                                                                                                                                                                                                                                                                                                                                                                                                                                                                                                                                                                                                              |
| France                         | <a href="https://www.has-sante.fr/portail/upload/docs/application/pdf/2016-04/2016_has_grille_de_recueil__icatb_2.pdf">https://www.has-sante.fr/portail/upload/docs/application/pdf/2016-04/2016_has_grille_de_recueil__icatb_2.pdf</a> This indicator is currently being reevaluated by the national health agency                                                                                                                                                                                                                                                                                                                                                                                                                                                                                                                                                                                                                                          |
| Germany                        | <a href="http://www.awmf.org/uploads/tx_szleitlinien/092-001I_S3_Antibiotika_Anwendung_im_Krankenhaus_2013-verlaengert.pdf">http://www.awmf.org/uploads/tx_szleitlinien/092-001I_S3_Antibiotika_Anwendung_im_Krankenhaus_2013-verlaengert.pdf</a> ;<br><a href="http://www.rki.de/DE/Content/Kommissi1n/ART/ART_node.html">www.rki.de/DE/Content/Kommissi1n/ART/ART_node.html</a>                                                                                                                                                                                                                                                                                                                                                                                                                                                                                                                                                                            |
| Greece                         | NP                                                                                                                                                                                                                                                                                                                                                                                                                                                                                                                                                                                                                                                                                                                                                                                                                                                                                                                                                           |
| Hungary                        | <a href="http://www.oek.hu/oekfile.pl?fid=6619">www.oek.hu/oekfile.pl?fid=6619</a>                                                                                                                                                                                                                                                                                                                                                                                                                                                                                                                                                                                                                                                                                                                                                                                                                                                                           |
| Ireland                        | NP                                                                                                                                                                                                                                                                                                                                                                                                                                                                                                                                                                                                                                                                                                                                                                                                                                                                                                                                                           |
| Israel                         | NP                                                                                                                                                                                                                                                                                                                                                                                                                                                                                                                                                                                                                                                                                                                                                                                                                                                                                                                                                           |
| Italy                          | <a href="http://www.salute.gov.it/portale/documentazi1/p6_2_2_1.jsp?lingua=italiano&amp;id=2660">http://www.salute.gov.it/portale/documentazi1/p6_2_2_1.jsp?lingua=italiano&amp;id=2660</a>                                                                                                                                                                                                                                                                                                                                                                                                                                                                                                                                                                                                                                                                                                                                                                  |
| Kosovo                         | NP                                                                                                                                                                                                                                                                                                                                                                                                                                                                                                                                                                                                                                                                                                                                                                                                                                                                                                                                                           |
| Latvia                         | Documents under development                                                                                                                                                                                                                                                                                                                                                                                                                                                                                                                                                                                                                                                                                                                                                                                                                                                                                                                                  |
| Lithuania                      | NP                                                                                                                                                                                                                                                                                                                                                                                                                                                                                                                                                                                                                                                                                                                                                                                                                                                                                                                                                           |
| Luxembourg                     | <a href="http://www.sante.public.lu/fr/index.php">http://www.sante.public.lu/fr/index.php</a>                                                                                                                                                                                                                                                                                                                                                                                                                                                                                                                                                                                                                                                                                                                                                                                                                                                                |
| Malta                          | NP                                                                                                                                                                                                                                                                                                                                                                                                                                                                                                                                                                                                                                                                                                                                                                                                                                                                                                                                                           |
| Netherlands                    | <a href="http://www.ateams.nl">www.ateams.nl</a>                                                                                                                                                                                                                                                                                                                                                                                                                                                                                                                                                                                                                                                                                                                                                                                                                                                                                                             |
| Norway                         | <a href="https://www.regjeringen.no/contentassets/915655269bc04a47928fce917e4b25f5/handlingsplan-antibiotikaresistens.pdf">https://www.regjeringen.no/contentassets/915655269bc04a47928fce917e4b25f5/handlingsplan-antibiotikaresistens.pdf</a> ;<br><a href="https://www.antibiotika.no/antibiotikastyringsprogram-2/">https://www.antibiotika.no/antibiotikastyringsprogram-2/</a>                                                                                                                                                                                                                                                                                                                                                                                                                                                                                                                                                                         |
| Poland                         | NP                                                                                                                                                                                                                                                                                                                                                                                                                                                                                                                                                                                                                                                                                                                                                                                                                                                                                                                                                           |
| Portugal                       | <a href="https://www.dgs.pt/programa-nacional-de-controlo-da-infeccao/despachos.aspx">https://www.dgs.pt/programa-nacional-de-controlo-da-infeccao/despachos.aspx</a>                                                                                                                                                                                                                                                                                                                                                                                                                                                                                                                                                                                                                                                                                                                                                                                        |
| Republic of Northern Macedonia | NP                                                                                                                                                                                                                                                                                                                                                                                                                                                                                                                                                                                                                                                                                                                                                                                                                                                                                                                                                           |
| Romania                        | <a href="https://www.srm.ro/pdf/protoco_MRSA_final%20mediere%20(2).pdf">https://www.srm.ro/pdf/protoco_MRSA_final%20mediere%20(2).pdf</a> ; <a href="http://www.srm.ro/pdf/ghid%20carbapenemaze_final_23.09.2015.pdf">http://www.srm.ro/pdf/ghid%20carbapenemaze_final_23.09.2015.pdf</a>                                                                                                                                                                                                                                                                                                                                                                                                                                                                                                                                                                                                                                                                    |
| Serbia                         | NP                                                                                                                                                                                                                                                                                                                                                                                                                                                                                                                                                                                                                                                                                                                                                                                                                                                                                                                                                           |
| Slovakia                       | NP                                                                                                                                                                                                                                                                                                                                                                                                                                                                                                                                                                                                                                                                                                                                                                                                                                                                                                                                                           |
| Slovenia                       | <a href="http://www.pisrs.si/Pis.web/pregledPredpisa?id=PRAV10625">http://www.pisrs.si/Pis.web/pregledPredpisa?id=PRAV10625</a> <a href="http://www.pisrs.si/Pis.web/pregledPredpisa?id=PRAV2033">http://www.pisrs.si/Pis.web/pregledPredpisa?id=PRAV2033</a>                                                                                                                                                                                                                                                                                                                                                                                                                                                                                                                                                                                                                                                                                                |
| Spain                          | <a href="https://www.sciencedirect.com/science/article/pii/S0213005X11003259?via%3Dihub">https://www.sciencedirect.com/science/article/pii/S0213005X11003259?via%3Dihub</a><br><a href="http://www.resistenciaantibioticos.es/es/publicaciones/programas-de-optimizacion-del-uso-de-antibioticos-proa">http://www.resistenciaantibioticos.es/es/publicaciones/programas-de-optimizacion-del-uso-de-antibioticos-proa</a>                                                                                                                                                                                                                                                                                                                                                                                                                                                                                                                                     |
| Sweden                         | <a href="http://strama.se">http://strama.se</a>                                                                                                                                                                                                                                                                                                                                                                                                                                                                                                                                                                                                                                                                                                                                                                                                                                                                                                              |
| Switzerland                    | Documents under development                                                                                                                                                                                                                                                                                                                                                                                                                                                                                                                                                                                                                                                                                                                                                                                                                                                                                                                                  |
| Turkey                         | <a href="http://www.akilciilac.gov.tr">ttp://www.akilciilac.gov.tr</a>                                                                                                                                                                                                                                                                                                                                                                                                                                                                                                                                                                                                                                                                                                                                                                                                                                                                                       |
| Ukraine                        | NP                                                                                                                                                                                                                                                                                                                                                                                                                                                                                                                                                                                                                                                                                                                                                                                                                                                                                                                                                           |
| United Kingdom                 | <a href="https://www.gov.uk/government/publications/the-health-and-social-care-act-2008-code-of-practice-on-the-prevention-and-control-of-infections-and-related-guidance#history">https://www.gov.uk/government/publications/the-health-and-social-care-act-2008-code-of-practice-on-the-prevention-and-control-of-infections-and-related-guidance#history</a> ; <a href="https://www.nice.org.uk/guidance/ng15">https://www.nice.org.uk/guidance/ng15</a>                                                                                                                                                                                                                                                                                                                                                                                                                                                                                                  |

AMS, Antimicrobial Stewardship; URL, Uniform Resource Locator; NP, not provided (or absent).

eTable 7. Details on national staffing standards for AMS hospital-based activities

| Country                        | AMS                                                                                                                                                                                                                                                                                                                                                                                                                                                 |
|--------------------------------|-----------------------------------------------------------------------------------------------------------------------------------------------------------------------------------------------------------------------------------------------------------------------------------------------------------------------------------------------------------------------------------------------------------------------------------------------------|
| Albania                        | NP                                                                                                                                                                                                                                                                                                                                                                                                                                                  |
| Austria                        | NP                                                                                                                                                                                                                                                                                                                                                                                                                                                  |
| Azerbaijan                     | NP                                                                                                                                                                                                                                                                                                                                                                                                                                                  |
| Belgium                        | Minimal staff in hospital with minimum 150 beds: 1 FTE hospital hygiene nurse and 0.5 FTE hospital hygienist .<br><a href="http://overlegorganen.gezondheid.belgie.be/sites/default/files/documents/belgische_commissie_voor_de_coördinatie_van_het_antibioticabeleid/15174562.pdf">http://overlegorganen.gezondheid.belgie.be/sites/default/files/documents/belgische_commissie_voor_de_coördinatie_van_het_antibioticabeleid/15174562.pdf</a>     |
| Bulgaria                       | NP                                                                                                                                                                                                                                                                                                                                                                                                                                                  |
| Croatia                        | NP                                                                                                                                                                                                                                                                                                                                                                                                                                                  |
| Czech Republic                 | NP                                                                                                                                                                                                                                                                                                                                                                                                                                                  |
| Cyprus                         | NP                                                                                                                                                                                                                                                                                                                                                                                                                                                  |
| Denmark                        | NP                                                                                                                                                                                                                                                                                                                                                                                                                                                  |
| Estonia                        | NP                                                                                                                                                                                                                                                                                                                                                                                                                                                  |
| Finland                        | NP                                                                                                                                                                                                                                                                                                                                                                                                                                                  |
| France                         | The appointed person should have the following dedicated time for AMS activities (not enforced in practice usually): 0,1 FTE / 400 rehabilitation or long-term care beds and 0,3 FTE / 400 acute care beds<br><a href="https://www.has-sante.fr/portail/upload/docs/application/pdf/2016-04/2016_has_grille_de_recueil_icatb_2.pdf">https://www.has-sante.fr/portail/upload/docs/application/pdf/2016-04/2016_has_grille_de_recueil_icatb_2.pdf</a> |
| Germany                        | At least 1 FTE per 500 acute care bed<br><a href="http://www.awmf.org/uploads/tx_szleitlinien/092-001I_S3_Antibiotika_Anwendung_im_Krankenhaus_2013-verlaengert.pdf">http://www.awmf.org/uploads/tx_szleitlinien/092-001I_S3_Antibiotika_Anwendung_im_Krankenhaus_2013-verlaengert.pdf</a>                                                                                                                                                          |
| Greece                         | NP                                                                                                                                                                                                                                                                                                                                                                                                                                                  |
| Hungary                        | <a href="http://njt.hu/cgi_bin/njt_doc.cgi?docid=124091">http://njt.hu/cgi_bin/njt_doc.cgi?docid=124091</a>                                                                                                                                                                                                                                                                                                                                         |
| Ireland                        | <a href="https://www.hpsc.ie/a-z/microbiologyantimicrobialresistance/infectioncontrolandhai/guidelines/File,4116,en.pdf">https://www.hpsc.ie/a-z/microbiologyantimicrobialresistance/infectioncontrolandhai/guidelines/File,4116,en.pdf</a> <a href="https://www.hiqa.ie/sites/default/files/2017-01/Antimicrobial-Stewardship-Review.pdf">https://www.hiqa.ie/sites/default/files/2017-01/Antimicrobial-Stewardship-Review.pdf</a>                 |
| Israel                         | NP                                                                                                                                                                                                                                                                                                                                                                                                                                                  |
| Italy                          | NP                                                                                                                                                                                                                                                                                                                                                                                                                                                  |
| Kosovo                         | NP                                                                                                                                                                                                                                                                                                                                                                                                                                                  |
| Latvia                         | 1 ID specialist and 2 nurses to 500 acute care beds                                                                                                                                                                                                                                                                                                                                                                                                 |
| Lithuania                      | NP                                                                                                                                                                                                                                                                                                                                                                                                                                                  |
| Luxembourg                     | NP                                                                                                                                                                                                                                                                                                                                                                                                                                                  |
| Malta                          | NP                                                                                                                                                                                                                                                                                                                                                                                                                                                  |
| Netherlands                    | <a href="http://www.swab.nl">www.swab.nl</a>                                                                                                                                                                                                                                                                                                                                                                                                        |
| Norway                         | NP                                                                                                                                                                                                                                                                                                                                                                                                                                                  |
| Poland                         | NP                                                                                                                                                                                                                                                                                                                                                                                                                                                  |
| Portugal                       | NP                                                                                                                                                                                                                                                                                                                                                                                                                                                  |
| Republic of Northern Macedonia | NP                                                                                                                                                                                                                                                                                                                                                                                                                                                  |
| Romania                        | NP                                                                                                                                                                                                                                                                                                                                                                                                                                                  |
| Serbia                         | NP                                                                                                                                                                                                                                                                                                                                                                                                                                                  |
| Slovakia                       | NP                                                                                                                                                                                                                                                                                                                                                                                                                                                  |
| Slovenia                       | NP                                                                                                                                                                                                                                                                                                                                                                                                                                                  |
| Spain                          | NP                                                                                                                                                                                                                                                                                                                                                                                                                                                  |
| Sweden                         | NP                                                                                                                                                                                                                                                                                                                                                                                                                                                  |
| Switzerland                    | NP                                                                                                                                                                                                                                                                                                                                                                                                                                                  |
| Turkey                         | NP                                                                                                                                                                                                                                                                                                                                                                                                                                                  |
| Ukraine                        | NP                                                                                                                                                                                                                                                                                                                                                                                                                                                  |
| United Kingdom                 | NP                                                                                                                                                                                                                                                                                                                                                                                                                                                  |

AMS, Antimicrobial Stewardship; IPC, Infection Prevention and Control; FTE, full-time equivalent; ID, Infectious Diseases; NP, not provided (or absent).



eTable 8. Web links to national guidance and requirements documents on IPC implementations in hospitals

| Country                        | URL                                                                                                                                                                                                                                                                                                                                                                                                                                                                                                                                                                              |
|--------------------------------|----------------------------------------------------------------------------------------------------------------------------------------------------------------------------------------------------------------------------------------------------------------------------------------------------------------------------------------------------------------------------------------------------------------------------------------------------------------------------------------------------------------------------------------------------------------------------------|
| Albania                        | NP                                                                                                                                                                                                                                                                                                                                                                                                                                                                                                                                                                               |
| Austria                        | <a href="https://www.sozialministerium.at/site/Gesundheit/Gesundheitssystem/Gesundheitssystem_Qualitaetsicherung/Qualitaetsstandards/QS_Krankenhaushygiene_nbsp_Qualitaetsstandard_Organisation_und_Strategie_der_Krankenhaus_Hygiene">https://www.sozialministerium.at/site/Gesundheit/Gesundheitssystem/Gesundheitssystem_Qualitaetsicherung/Qualitaetsstandards/QS_Krankenhaushygiene_nbsp_Qualitaetsstandard_Organisation_und_Strategie_der_Krankenhaus_Hygiene</a>                                                                                                          |
| Azerbaijan                     | NP                                                                                                                                                                                                                                                                                                                                                                                                                                                                                                                                                                               |
| Belgium                        | <a href="http://www.ejustice.just.fgov.be/cgi_loi/change_lg.pl?language=nl&amp;la=N&amp;table_name=wet&amp;cn=2007042667;">http://www.ejustice.just.fgov.be/cgi_loi/change_lg.pl?language=nl&amp;la=N&amp;table_name=wet&amp;cn=2007042667;</a><br><a href="http://overlegorganen.gezondheid.belgie.be/sites/default/files/documents/belgische_commissie_voor_de_coordinatie_van_het_antibioticabeleid/15174562.pdf">http://overlegorganen.gezondheid.belgie.be/sites/default/files/documents/belgische_commissie_voor_de_coordinatie_van_het_antibioticabeleid/15174562.pdf</a> |
| Bulgaria                       | <a href="https://www.mh.government.bg/media/filer_public/2015/11/18/prevenciq-control-vutrebolnichni-infekcii.pdf">https://www.mh.government.bg/media/filer_public/2015/11/18/prevenciq-control-vutrebolnichni-infekcii.pdf</a>                                                                                                                                                                                                                                                                                                                                                  |
| Croatia                        | NP                                                                                                                                                                                                                                                                                                                                                                                                                                                                                                                                                                               |
| Czech Republic                 | <a href="https://www.mzcr.cz/obsah/program-prevence-a-kontroly-infekci-v-zdravotnickych-zarizenich_2917_5.html">https://www.mzcr.cz/obsah/program-prevence-a-kontroly-infekci-v-zdravotnickych-zarizenich_2917_5.html</a>                                                                                                                                                                                                                                                                                                                                                        |
| Cyprus                         | <a href="https://www.moh.gov.cy/moh/moh.nsf/All/6B4121829D8502A5C2257C210026E74C">https://www.moh.gov.cy/moh/moh.nsf/All/6B4121829D8502A5C2257C210026E74C</a>                                                                                                                                                                                                                                                                                                                                                                                                                    |
| Denmark                        | <a href="https://www.ssi.dk/">https://www.ssi.dk/</a>                                                                                                                                                                                                                                                                                                                                                                                                                                                                                                                            |
| Estonia                        | NP                                                                                                                                                                                                                                                                                                                                                                                                                                                                                                                                                                               |
| Finland                        | <a href="https://thl.fi/fi/web/infektiaudit/ohjeet-ja-saadokset/saadokset/kansalliset/uusi-tartuntatautilaki-1.3.2017-alkaen-muutoksia-aiempan/hoitoon-liittyvien-infektioiden-seuranta-ja-torjuntaveloitteet">https://thl.fi/fi/web/infektiaudit/ohjeet-ja-saadokset/saadokset/kansalliset/uusi-tartuntatautilaki-1.3.2017-alkaen-muutoksia-aiempan/hoitoon-liittyvien-infektioiden-seuranta-ja-torjuntaveloitteet</a>                                                                                                                                                          |
| France                         | <a href="http://nosobase.chu-lyon.fr/Reglementation/2000/Circulaire/291200.pdf">http://nosobase.chu-lyon.fr/Reglementation/2000/Circulaire/291200.pdf</a> <a href="http://solidarites-sante.gouv.fr/IMG/pdf/2015_202to.pdf">http://solidarites-sante.gouv.fr/IMG/pdf/2015_202to.pdf</a> ;<br><a href="http://solidarites-sante.gouv.fr/IMG/pdf/infections_nosocomiales_-_annexe_4_-_indicateur_optionnel.pdf">http://solidarites-sante.gouv.fr/IMG/pdf/infections_nosocomiales_-_annexe_4_-_indicateur_optionnel.pdf</a>                                                         |
| Germany                        | <a href="https://www.rki.de/DE/Content/Infekt/Krankenhaushygiene/Kommission/kommission_node.html">https://www.rki.de/DE/Content/Infekt/Krankenhaushygiene/Kommission/kommission_node.html</a> ;<br><a href="https://www.rki.de/DE/Content/Kommissi1n/KRINKO/krinko_node.html">https://www.rki.de/DE/Content/Kommissi1n/KRINKO/krinko_node.html</a>                                                                                                                                                                                                                               |
| Greece                         | <a href="http://www.eeel.gr/articlefiles/nomothesia/fek_388_2013_peri_enl.pdf">http://www.eeel.gr/articlefiles/nomothesia/fek_388_2013_peri_enl.pdf</a>                                                                                                                                                                                                                                                                                                                                                                                                                          |
| Hungary                        | <a href="http://njt.hu/cgi_bin/njt_doc.cgi?docid=1240">http://njt.hu/cgi_bin/njt_doc.cgi?docid=1240</a> ; <a href="https://net.jogtar.hu/jogszabaly?docid=A0900020.EUM">https://net.jogtar.hu/jogszabaly?docid=A0900020.EUM</a>                                                                                                                                                                                                                                                                                                                                                  |
| Ireland                        | <a href="https://www.hpsc.ie/a-z/microbiologyantimicrobialresistance/infectioncontrolandhai/guidelines/File,4116,en.pdf">https://www.hpsc.ie/a-z/microbiologyantimicrobialresistance/infectioncontrolandhai/guidelines/File,4116,en.pdf</a> ;<br><a href="https://www.hiqa.ie/sites/default/files/2017-05/2017-HIQA-National-Standards-Healthcare-Association-Infections.pdf">https://www.hiqa.ie/sites/default/files/2017-05/2017-HIQA-National-Standards-Healthcare-Association-Infections.pdf</a>                                                                             |
| Israel                         | NP                                                                                                                                                                                                                                                                                                                                                                                                                                                                                                                                                                               |
| Italy                          | <a href="http://www.salute.gov.it/imgs/C_17_pagineAree_4621_listaFile_itemName_0_file.pdf">http://www.salute.gov.it/imgs/C_17_pagineAree_4621_listaFile_itemName_0_file.pdf</a>                                                                                                                                                                                                                                                                                                                                                                                                  |
| Kosovo                         | NP                                                                                                                                                                                                                                                                                                                                                                                                                                                                                                                                                                               |
| Latvia                         | <a href="http://www.vi.gov.lv/lv/veselibas-aprupe/arstniecibas-iestades/info-arstn-iest-par-higieniska-un-pretepidemiska-rezima-plana-izstradi">http://www.vi.gov.lv/lv/veselibas-aprupe/arstniecibas-iestades/info-arstn-iest-par-higieniska-un-pretepidemiska-rezima-plana-izstradi</a>                                                                                                                                                                                                                                                                                        |
| Lithuania                      | NP                                                                                                                                                                                                                                                                                                                                                                                                                                                                                                                                                                               |
| Luxembourg                     | NP                                                                                                                                                                                                                                                                                                                                                                                                                                                                                                                                                                               |
| Malta                          | NP                                                                                                                                                                                                                                                                                                                                                                                                                                                                                                                                                                               |
| Netherlands                    | NP                                                                                                                                                                                                                                                                                                                                                                                                                                                                                                                                                                               |
| Norway                         | <a href="https://lovdata.no/dokument/SF/forskrift/2005-06-17-610?q=smittevern">https://lovdata.no/dokument/SF/forskrift/2005-06-17-610?q=smittevern</a>                                                                                                                                                                                                                                                                                                                                                                                                                          |
| Poland                         | NP                                                                                                                                                                                                                                                                                                                                                                                                                                                                                                                                                                               |
| Portugal                       | <a href="https://www.dgs.pt/programa-nacional-de-controlo-da-infeccao/despachos.aspx">https://www.dgs.pt/programa-nacional-de-controlo-da-infeccao/despachos.aspx</a>                                                                                                                                                                                                                                                                                                                                                                                                            |
| Republic of Northern Macedonia | NP                                                                                                                                                                                                                                                                                                                                                                                                                                                                                                                                                                               |
| Romania                        | <a href="http://www.oamr.ro/wp-content/uploads/2016/09/Ord-MS-1101-2016.pdf">http://www.oamr.ro/wp-content/uploads/2016/09/Ord-MS-1101-2016.pdf</a>                                                                                                                                                                                                                                                                                                                                                                                                                              |
| Serbia                         | NP                                                                                                                                                                                                                                                                                                                                                                                                                                                                                                                                                                               |
| Slovakia                       | NP                                                                                                                                                                                                                                                                                                                                                                                                                                                                                                                                                                               |
| Slovenia                       | <a href="http://www.uradni-list.si/1/objava.jsp?urlid=200633&amp;stevilka=1348">http://www.uradni-list.si/1/objava.jsp?urlid=200633&amp;stevilka=1348</a> <a href="http://www.uradni-list.si/1/objava.jsp?urlid=199974&amp;stevilka=3597">http://www.uradni-list.si/1/objava.jsp?urlid=199974&amp;stevilka=3597</a> ;<br><a href="http://www.uradni-list.si/1/objava.jsp?urlid=200692&amp;stevilka=3969">http://www.uradni-list.si/1/objava.jsp?urlid=200692&amp;stevilka=3969</a>                                                                                               |
| Spain                          | NP                                                                                                                                                                                                                                                                                                                                                                                                                                                                                                                                                                               |
| Sweden                         | <a href="http://www.socialstyrelsen.se/english">http://www.socialstyrelsen.se/english</a><br><a href="https://www.varhandboken.se/om/om-varhandboken/in-english/">https://www.varhandboken.se/om/om-varhandboken/in-english/</a><br><a href="https://www.folkhalsomyndigheten.se/the-public-health-agency-of-sweden/">https://www.folkhalsomyndigheten.se/the-public-health-agency-of-sweden/</a>                                                                                                                                                                                |
| Switzerland                    | NP                                                                                                                                                                                                                                                                                                                                                                                                                                                                                                                                                                               |
| Turkey                         | <a href="http://www.ttb.org.tr/mevzuat/index.php?option=com_content&amp;view=article&amp;id=333:yatakli-tedavkurumlari-enfekson-kontrol-yetmel&amp;catid=2:yelik&amp;Itemid=33">http://www.ttb.org.tr/mevzuat/index.php?option=com_content&amp;view=article&amp;id=333:yatakli-tedavkurumlari-enfekson-kontrol-yetmel&amp;catid=2:yelik&amp;Itemid=33</a>                                                                                                                                                                                                                        |
| Ukraine                        | NP                                                                                                                                                                                                                                                                                                                                                                                                                                                                                                                                                                               |
| United Kingdom                 | <a href="https://www.nice.org.uk/guidance/ph36">https://www.nice.org.uk/guidance/ph36</a> ; <a href="https://www.gov.uk/government/publications/review-of-the-infection-prevention-and-control-nurse-workforce">https://www.gov.uk/government/publications/review-of-the-infection-prevention-and-control-nurse-workforce</a>                                                                                                                                                                                                                                                    |

IPC, Infection Prevention and Control; URL, Uniform Resource Locator; NP, not provided (or absent).

**eTable 9. Details on national staffing standards for IPC hospital-based activities**

| Country                        | IPC                                                                                                                                                                                                                                                                                                                                                                                                                                                                                                                                                                                                                                                                                                                                                                                                                    |
|--------------------------------|------------------------------------------------------------------------------------------------------------------------------------------------------------------------------------------------------------------------------------------------------------------------------------------------------------------------------------------------------------------------------------------------------------------------------------------------------------------------------------------------------------------------------------------------------------------------------------------------------------------------------------------------------------------------------------------------------------------------------------------------------------------------------------------------------------------------|
| Albania                        | NP                                                                                                                                                                                                                                                                                                                                                                                                                                                                                                                                                                                                                                                                                                                                                                                                                     |
| Austria                        | <a href="https://www.bmgf.gv.at/home/Gesundheit/Gesundheitssystem_Qualitaetssicherung/Qualitaetsstandards/QS_Krankenhaushygiene_nbsp_">https://www.bmgf.gv.at/home/Gesundheit/Gesundheitssystem_Qualitaetssicherung/Qualitaetsstandards/QS_Krankenhaushygiene_nbsp_</a><br><a href="https://www.sozialministerium.at/site/Gesundheit/Gesundheitssystem/Gesundheitssystem_Qualitaetssicherung/Qualitaetsstandards/-QS_Krankenhaushygiene_nbsp_Qualitaetsstandard_Organisation_und_Strategie_der_Kranken">https://www.sozialministerium.at/site/Gesundheit/Gesundheitssystem/Gesundheitssystem_Qualitaetssicherung/Qualitaetsstandards/-QS_Krankenhaushygiene_nbsp_Qualitaetsstandard_Organisation_und_Strategie_der_Kranken</a><br>1 FTE IPC-MD/400-800 beds and 1 FTE nurse/150-400 beds depending on type of hospital |
| Azerbaijan                     | NP                                                                                                                                                                                                                                                                                                                                                                                                                                                                                                                                                                                                                                                                                                                                                                                                                     |
| Belgium                        | 1 FTE MD-IPC/1000 beds and 1 FTE nurse-IPC/400 beds                                                                                                                                                                                                                                                                                                                                                                                                                                                                                                                                                                                                                                                                                                                                                                    |
| Bulgaria                       | 1 FTE CM specialist plus 1 FTE IPC nurse per 500 care beds for the IPC team                                                                                                                                                                                                                                                                                                                                                                                                                                                                                                                                                                                                                                                                                                                                            |
| Croatia                        | 1 FTE nurse /250 beds                                                                                                                                                                                                                                                                                                                                                                                                                                                                                                                                                                                                                                                                                                                                                                                                  |
| Czech Republic                 | Minimal personal standards for hospital hygiene departments 1000 beds: 1 MD + 2 nonMDs every other 300 beds: + 1 nonMD                                                                                                                                                                                                                                                                                                                                                                                                                                                                                                                                                                                                                                                                                                 |
| Cyprus                         | here is a FTE nurse for every 250 acute care beds                                                                                                                                                                                                                                                                                                                                                                                                                                                                                                                                                                                                                                                                                                                                                                      |
| Denmark                        | NP                                                                                                                                                                                                                                                                                                                                                                                                                                                                                                                                                                                                                                                                                                                                                                                                                     |
| Estonia                        | NP                                                                                                                                                                                                                                                                                                                                                                                                                                                                                                                                                                                                                                                                                                                                                                                                                     |
| Finland                        | NP                                                                                                                                                                                                                                                                                                                                                                                                                                                                                                                                                                                                                                                                                                                                                                                                                     |
| France                         | 1 FTE IPC nurse for 400 beds 1 FTE IPC MD or PharmD for 800 beds <a href="http://nosobase.chu-lyon.fr/Reglementation/2000/Circulaire/291200.pdf">http://nosobase.chu-lyon.fr/Reglementation/2000/Circulaire/291200.pdf</a>                                                                                                                                                                                                                                                                                                                                                                                                                                                                                                                                                                                             |
| Germany                        | At least 1 FTE per 400 acute care bed, also depending on the region <a href="http://www.awmf.org/uploads/tx_szleitlinien/092-001l_S3_Antibiotika_Anwendung_im_Krankenhaus_2013-verlaengert.pdf">http://www.awmf.org/uploads/tx_szleitlinien/092-001l_S3_Antibiotika_Anwendung_im_Krankenhaus_2013-verlaengert.pdf</a>                                                                                                                                                                                                                                                                                                                                                                                                                                                                                                  |
| Greece                         | <a href="http://www.eeel.gr/articlefiles/nomothesia/fek_388_2013_peri_enl.pdf">http://www.eeel.gr/articlefiles/nomothesia/fek_388_2013_peri_enl.pdf</a>                                                                                                                                                                                                                                                                                                                                                                                                                                                                                                                                                                                                                                                                |
| Hungary                        | <a href="http://njt.hu/cgi_bin/njt_doc.cgi?docid=124091">http://njt.hu/cgi_bin/njt_doc.cgi?docid=124091</a>                                                                                                                                                                                                                                                                                                                                                                                                                                                                                                                                                                                                                                                                                                            |
| Ireland                        | 1 full-time IPC nurse for 150-200 patients <a href="https://www.hpsc.ie/a-z/microbiologyantimicrobialresistance/infectioncontrolandhai/guidelines/File,4116,en.pdf">https://www.hpsc.ie/a-z/microbiologyantimicrobialresistance/infectioncontrolandhai/guidelines/File,4116,en.pdf</a>                                                                                                                                                                                                                                                                                                                                                                                                                                                                                                                                 |
| Israel                         | NP                                                                                                                                                                                                                                                                                                                                                                                                                                                                                                                                                                                                                                                                                                                                                                                                                     |
| Italy                          | NP                                                                                                                                                                                                                                                                                                                                                                                                                                                                                                                                                                                                                                                                                                                                                                                                                     |
| Kosovo                         | 1 IPC nurse in 500 beds                                                                                                                                                                                                                                                                                                                                                                                                                                                                                                                                                                                                                                                                                                                                                                                                |
| Latvia                         | 1 ID and 2 nurses to 500 acute care beds.                                                                                                                                                                                                                                                                                                                                                                                                                                                                                                                                                                                                                                                                                                                                                                              |
| Lithuania                      | 1 IPC doctor for 400 hospital beds, or 100 000 ambulatory consultations in polyclinic 1 IPC nurse for 100 hospital beds, or 50 000-100 000 ambulatory consultations in polyclinic <a href="https://e-seimas.lrs.lt/portal/legalAct/lt/TAD/TAIS.332026">https://e-seimas.lrs.lt/portal/legalAct/lt/TAD/TAIS.332026</a>                                                                                                                                                                                                                                                                                                                                                                                                                                                                                                  |
| Luxembourg                     | NP                                                                                                                                                                                                                                                                                                                                                                                                                                                                                                                                                                                                                                                                                                                                                                                                                     |
| Malta                          | NP                                                                                                                                                                                                                                                                                                                                                                                                                                                                                                                                                                                                                                                                                                                                                                                                                     |
| Netherlands                    | 1 nurse per 5000 admissions, 1 MD per 25000 admissions <a href="http://www.igj.nl">www.igj.nl</a>                                                                                                                                                                                                                                                                                                                                                                                                                                                                                                                                                                                                                                                                                                                      |
| Norway                         | NP                                                                                                                                                                                                                                                                                                                                                                                                                                                                                                                                                                                                                                                                                                                                                                                                                     |
| Poland                         | Just for nurses: 1 FTE of IPC nurse per 200 beds                                                                                                                                                                                                                                                                                                                                                                                                                                                                                                                                                                                                                                                                                                                                                                       |
| Portugal                       | 1 FTE nurse per 250 beds 1 FTE physicians per hospital with more than 250 beds                                                                                                                                                                                                                                                                                                                                                                                                                                                                                                                                                                                                                                                                                                                                         |
| Republic of Northern Macedonia | NP                                                                                                                                                                                                                                                                                                                                                                                                                                                                                                                                                                                                                                                                                                                                                                                                                     |
| Romania                        | 1 epidemiologist and 1 ID specialist for every 400 beds and 1 nurse for every 250 beds<br><a href="http://www.oamr.ro/wp-content/uploads/2016/09/Ord-MS-1101-2016.pdf">http://www.oamr.ro/wp-content/uploads/2016/09/Ord-MS-1101-2016.pdf</a>                                                                                                                                                                                                                                                                                                                                                                                                                                                                                                                                                                          |
| Serbia                         | NP                                                                                                                                                                                                                                                                                                                                                                                                                                                                                                                                                                                                                                                                                                                                                                                                                     |
| Slovakia                       | NP                                                                                                                                                                                                                                                                                                                                                                                                                                                                                                                                                                                                                                                                                                                                                                                                                     |
| Slovenia                       | NP                                                                                                                                                                                                                                                                                                                                                                                                                                                                                                                                                                                                                                                                                                                                                                                                                     |
| Spain                          | NP                                                                                                                                                                                                                                                                                                                                                                                                                                                                                                                                                                                                                                                                                                                                                                                                                     |
| Sweden                         | NP                                                                                                                                                                                                                                                                                                                                                                                                                                                                                                                                                                                                                                                                                                                                                                                                                     |
| Switzerland                    | NP                                                                                                                                                                                                                                                                                                                                                                                                                                                                                                                                                                                                                                                                                                                                                                                                                     |
| Turkey                         | Each 150 occupied beds, 1 FTE IPC nurse is required; <a href="http://www.resmigazete.gov.tr/eskiler/2005/08/20050811-6.htm">http://www.resmigazete.gov.tr/eskiler/2005/08/20050811-6.htm</a>                                                                                                                                                                                                                                                                                                                                                                                                                                                                                                                                                                                                                           |
| Ukraine                        | NP                                                                                                                                                                                                                                                                                                                                                                                                                                                                                                                                                                                                                                                                                                                                                                                                                     |
| United Kingdom                 | <a href="https://www.gov.uk/government/uploads/system/uploads/attachment_data/file/449049/Code_of_practice_280715_acc.pdf">https://www.gov.uk/government/uploads/system/uploads/attachment_data/file/449049/Code_of_practice_280715_acc.pdf</a>                                                                                                                                                                                                                                                                                                                                                                                                                                                                                                                                                                        |

AMS, Antimicrobial Stewardship; IPC, Infection Prevention and Control; FTE, full-time equivalent; MD, Medical Doctor; CM, Clinical Microbiology; ID, Infectious Diseases; NP, not provided (or absent).

**eTable 10. Educational national requirements regarding AMS and IPC during postgraduate training across Europe (all questions only referring to medical doctors)**

| Country                        | Antimicrobial stewardship                                       |     |     |                                                         |     |     | Infection Prevention and Control                                |     |     |                                                         |     |     |
|--------------------------------|-----------------------------------------------------------------|-----|-----|---------------------------------------------------------|-----|-----|-----------------------------------------------------------------|-----|-----|---------------------------------------------------------|-----|-----|
|                                | Mandatory formal training on AMS implementation during training |     |     | Mandatory involvement in AMS activities during training |     |     | Mandatory formal training on IPC implementation during training |     |     | Mandatory involvement in IPC activities during training |     |     |
| <i>Trainee category</i>        | CM                                                              | ID  | IPC | CM                                                      | ID  | IPC | CM                                                              | ID  | IPC | CM                                                      | ID  | IPC |
| Albania                        | No                                                              | No  | NA  | No                                                      | No  | NA  | No                                                              | No  | NA  | No                                                      | No  | NA  |
| Austria                        | Yes                                                             | Yes | Yes | No                                                      | No  | No  | Yes                                                             | No  | Yes | Yes                                                     | No  | Yes |
| Azerbaijan                     | Yes                                                             | No  | NP  | Yes                                                     | No  | NP  | No                                                              | No  | NP  | No                                                      | No  | NP  |
| Belgium                        | Yes                                                             | Yes | Yes | Yes                                                     | Yes | Yes | Yes                                                             | Yes | Yes | Yes                                                     | Yes | Yes |
| Bulgaria                       | Yes                                                             | No  | Yes | Yes                                                     | Yes | Yes | Yes                                                             | No  | Yes | Yes                                                     | NA  | Yes |
| Croatia                        | No                                                              | No  | No  | No                                                      | Yes | No  | Yes                                                             | No  | Yes | Yes                                                     | Yes | Yes |
| Czech Republic                 | Yes                                                             | No  | No  | Yes                                                     | No  | No  | No                                                              | No  | Yes | No                                                      | No  | Yes |
| Cyprus                         | No                                                              | NP  | NA  | No                                                      | No  | NA  | No                                                              | NP  | NA  | No                                                      | No  | NA  |
| Denmark                        | No                                                              | No  | NA  | No                                                      | No  | NA  | No                                                              | No  | NA  | No                                                      | No  | NA  |
| Estonia                        | No                                                              | No  | No  | NP                                                      | Yes | Yes | No                                                              | No  | No  | No                                                      | Yes | Yes |
| Finland                        | No                                                              | No  | No  | No                                                      | No  | No  | No                                                              | No  | No  | No                                                      | Yes | NP  |
| France                         | No                                                              | Yes | Yes | No                                                      | Yes | No  | No                                                              | No  | Yes | No                                                      | No  | Yes |
| Germany                        | No                                                              | No  | No  | No                                                      | No  | No  | No                                                              | No  | Yes | Yes                                                     | Yes | Yes |
| Greece                         | No                                                              | Yes | NA  | No                                                      | No  | NA  | Yes                                                             | Yes | NA  | Yes                                                     | Yes | NA  |
| Hungary                        | No                                                              | No  | No  | Yes                                                     | Yes | Yes | Yes                                                             | Yes | No  | Yes                                                     | Yes | Yes |
| Ireland                        | Yes                                                             | Yes | NA  | Yes                                                     | Yes | NA  | Yes                                                             | No  | NA  | Yes                                                     | Yes | NA  |
| Israel                         | No                                                              | Yes | NA  | No                                                      | Yes | NA  | No                                                              | No  | NA  | No                                                      | No  | NA  |
| Italy                          | No                                                              | No  | NA  | No                                                      | No  | NA  | No                                                              | No  | NA  | No                                                      | No  | NA  |
| Kosovo                         | No                                                              | No  | NA  | No                                                      | No  | NA  | No                                                              | No  | NA  | No                                                      | No  | NA  |
| Latvia                         | NA                                                              | No  | NA  | NA                                                      | Yes | NA  | NA                                                              | Yes | NA  | NA                                                      | Yes | NA  |
| Lithuania                      | No                                                              | No  | NA  | No                                                      | No  | NA  | No                                                              | No  | NA  | NP                                                      | NP  | NA  |
| Luxembourg                     | No                                                              | No  | NA  | No                                                      | No  | No  | NP                                                              | NP  | NP  | NP                                                      | NP  | NA  |
| Malta                          | NP                                                              | NP  | NP  | Yes                                                     | No  | Yes | NP                                                              | NP  | NP  | Yes                                                     | No  | Yes |
| Netherlands                    | No                                                              | No  | NA  | Yes                                                     | Yes | NA  | Yes                                                             | No  | NA  | Yes                                                     | No  | NA  |
| Norway                         | No                                                              | No  | NA  | No                                                      | No  | NA  | Yes                                                             | Yes | NA  | No                                                      | No  | NA  |
| Poland                         | Yes                                                             | No  | NA  | Yes                                                     | No  | NA  | Yes                                                             | No  | NA  | Yes                                                     | No  | NA  |
| Portugal                       | NA                                                              | No  | NA  | NA                                                      | No  | NA  | NA                                                              | No  | NA  | NA                                                      | No  | NA  |
| Republic of Northern Macedonia | NP                                                              | NP  | NA  | NP                                                      | NP  | NA  | Yes                                                             | Yes | NA  | Yes                                                     | Yes | NA  |
| Romania                        | No                                                              | No  | NA  | No                                                      | No  | NA  | Yes                                                             | Yes | NA  | Yes                                                     | Yes | NA  |
| Serbia                         | Yes                                                             | Yes | Yes | Yes                                                     | Yes | Yes | No                                                              | Yes | Yes | No                                                      | Yes | Yes |
| Slovakia                       | No                                                              | No  | NA  | No                                                      | No  | NA  | No                                                              | No  | NA  | No                                                      | No  | NA  |
| Slovenia                       | No                                                              | No  | NA  | No                                                      | Yes | NA  | Yes                                                             | Yes | NA  | No                                                      | No  | NA  |
| Spain                          | No                                                              | NA  | No  | No                                                      | NA  | No  | No                                                              | NA  | Yes | No                                                      | NA  | Yes |
| Sweden                         | No                                                              | No  | No  | No                                                      | No  | No  | Yes                                                             | Yes | Yes | Yes                                                     | Yes | Yes |
| Switzerland                    | No                                                              | No  | NA  | No                                                      | No  | No  | No                                                              | Yes | No  | No                                                      | No  | NA  |
| Turkey                         | No                                                              | No  | NA  | No                                                      | No  | NA  | No                                                              | No  | NA  | No                                                      | Yes | NA  |
| Ukraine                        | Yes                                                             | Yes | NA  | Yes                                                     | Yes | NA  | Yes                                                             | Yes | NA  | Yes                                                     | Yes | NA  |
| United Kingdom                 | No                                                              | No  | NA  | No                                                      | No  | NA  | Yes                                                             | Yes | NA  | Yes                                                     | Yes | NA  |

AMS, Antimicrobial Stewardship; IPC, Infection Prevention and Control; PG, postgraduate; CM, Clinical Microbiology; ID, Infectious Diseases; IPC, Infection Prevention and Control; NA, not applicable; NP, answer not provided/I do not know.

**eTable 11. Professionals usually in charge of running AMS and IPC activities in European hospitals**

| Country<br><i>Category</i>     | Antimicrobial stewardship |    |            |       |       | Infection Prevention and Control |    |            |       |       |
|--------------------------------|---------------------------|----|------------|-------|-------|----------------------------------|----|------------|-------|-------|
|                                | CM                        | ID | Pharmacist | Nurse | Other | CM                               | ID | Pharmacist | Nurse | Other |
| Albania                        | X                         | X  | X          |       |       | X                                | X  |            | X     |       |
| Austria                        | X                         | X  | X          |       | X     | X                                | X  |            | X     | X     |
| Azerbaijan                     | X                         |    |            |       |       | X                                | X  |            |       |       |
| Belgium                        | X                         | X  | X          |       | X     | X                                |    |            | X     | X     |
| Bulgaria                       | X                         |    | X          |       |       | X                                |    |            | X     | X     |
| Croatia                        | X                         | X  |            |       | X     | X                                | X  |            | X     | X     |
| Czech Republic                 | X                         | X  |            |       |       |                                  |    |            | X     | X     |
| Cyprus                         |                           |    |            |       | X     |                                  | X  |            | X     |       |
| Denmark                        | X                         | X  | X          |       |       | X                                | X  |            | X     |       |
| Estonia                        |                           | X  |            |       |       |                                  | X  |            | X     |       |
| Finland                        |                           | X  |            |       |       | X                                | X  |            | X     |       |
| France                         | X                         | X  | X          |       | X     | X                                |    | X          | X     | X     |
| Germany                        | X                         | X  | X          | X     | X     | X                                |    |            |       | X     |
| Greece                         |                           | X  | X          |       |       | X                                | X  | X          | X     | X     |
| Hungary                        |                           | X  |            |       |       |                                  | X  |            | X     | X     |
| Ireland                        | X                         | X  | X          | X     |       | X                                |    |            | X     | X     |
| Israel                         |                           | X  |            |       |       |                                  | X  |            | X     |       |
| Italy                          |                           | X  | X          |       |       |                                  |    |            | X     | X     |
| Kosovo                         | X                         | X  | X          |       |       | X                                | X  |            | X     |       |
| Latvia                         |                           | X  | X          | X     |       |                                  |    |            | X     |       |
| Lithuania                      | X                         |    | X          |       | X     |                                  |    |            |       |       |
| Luxembourg                     | X                         | X  | X          |       |       | X                                | X  | X          |       |       |
| Malta                          | X                         | X  | X          |       |       |                                  |    |            | X     |       |
| Netherlands                    | X                         | X  | X          |       |       | X                                |    |            | X     |       |
| Norway                         | X                         | X  | X          | X     |       | X                                | X  |            | X     |       |
| Poland                         | X                         | X  | X          |       |       | X                                | X  |            | X     |       |
| Portugal                       |                           | X  | X          | X     |       |                                  | X  |            | X     |       |
| Republic of Northern Macedonia |                           |    |            | X     | X     |                                  |    |            | X     | X     |
| Romania                        |                           | X  |            |       | X     |                                  | X  |            | X     | X     |
| Serbia                         |                           | X  | X          |       |       |                                  | X  | X          |       |       |
| Slovakia                       |                           |    | X          |       |       |                                  | X  |            |       |       |
| Slovenia                       | X                         | X  | X          |       |       | X                                | X  |            | X     | X     |
| Spain                          | X                         |    | X          |       | X     | X                                |    |            | X     | X     |
| Sweden                         | X                         | X  | X          | X     |       | X                                | X  |            | X     | X     |
| Switzerland                    |                           | X  |            |       |       |                                  | X  |            | X     |       |
| Turkey                         | X                         | X  |            |       |       | X                                | X  |            | X     |       |
| Ukraine                        | X                         |    |            | X     | X     |                                  |    |            | X     | X     |
| United Kingdom                 | X                         | X  | X          |       |       | X                                | X  |            | X     |       |

CM, Clinical Microbiology; ID, Infectious Diseases

eTable 12. Other aspects of usual practice of professionals involved in AMS/IPC in European countries

| Country                        | Miscellaneous                                                            |                                                 |                                                              |
|--------------------------------|--------------------------------------------------------------------------|-------------------------------------------------|--------------------------------------------------------------|
|                                | CM & ID specialists work exclusively in hospitals (only referring to MD) | CM usually do clinical rounds on hospital wards | IPC specialists usually do clinical rounds on hospital wards |
| Albania                        | No                                                                       | No                                              | NA                                                           |
| Austria                        | No                                                                       | Yes                                             | Yes                                                          |
| Azerbaijan                     | Yes for both                                                             | No                                              | Yes                                                          |
| Belgium                        | No                                                                       | Yes                                             | Yes                                                          |
| Bulgaria                       | Yes for both                                                             | Yes                                             | Yes                                                          |
| Croatia                        | Only ID                                                                  | Yes                                             | Yes                                                          |
| Czech Republic                 | Yes for both                                                             | Yes                                             | Yes                                                          |
| Cyprus                         | No                                                                       | No                                              | NA                                                           |
| Denmark                        | Yes for both                                                             | No                                              | NA                                                           |
| Estonia                        | No                                                                       | No                                              | Yes                                                          |
| Finland                        | Yes for both                                                             | No                                              | Yes                                                          |
| France                         | No                                                                       | No                                              | Yes                                                          |
| Germany                        | No                                                                       | Yes                                             | Yes                                                          |
| Greece                         | Only ID                                                                  | No                                              | NA                                                           |
| Hungary                        | Only ID                                                                  | No                                              | Yes                                                          |
| Ireland                        | Yes for both                                                             | Yes                                             | NA                                                           |
| Israel                         | Yes for both                                                             | No                                              | NA                                                           |
| Italy                          | No                                                                       | No                                              | NA                                                           |
| Kosovo                         | Only ID                                                                  | Yes                                             | NA                                                           |
| Latvia                         | No                                                                       | NA                                              | NA                                                           |
| Lithuania                      | Yes for both                                                             | Yes                                             | NA                                                           |
| Luxembourg                     | Only ID                                                                  | Yes                                             | NA                                                           |
| Malta                          | Yes for both                                                             | Yes                                             | No                                                           |
| Netherlands                    | Only ID                                                                  | Yes                                             | NA                                                           |
| Norway                         | Yes for both                                                             | Yes                                             | NA                                                           |
| Poland                         | Only CM                                                                  | Yes                                             | NA                                                           |
| Portugal                       | No                                                                       | NA                                              | NA                                                           |
| Republic of Northern Macedonia | No                                                                       | NP                                              | NA                                                           |
| Romania                        | Only ID                                                                  | No                                              | NA                                                           |
| Serbia                         | Only ID                                                                  | No                                              | No                                                           |
| Slovakia                       | Only ID                                                                  | Yes                                             | NA                                                           |
| Slovenia                       | Only ID                                                                  | No                                              | NA                                                           |
| Spain                          | Only CM                                                                  | No                                              | No                                                           |
| Sweden                         | No                                                                       | No                                              | Yes                                                          |
| Switzerland                    | Yes for both                                                             | No                                              | NA                                                           |
| Turkey                         | Yes for both                                                             | Yes                                             | NA                                                           |
| Ukraine                        | No                                                                       | Yes                                             | NA                                                           |
| United Kingdom                 | Only ID                                                                  | Yes                                             | NA                                                           |

AMS, Antimicrobial Stewardship; IPC, Infection Prevention and Control; CM, Clinical Microbiology; ID, Infectious Diseases; MD, medical doctor; IPC, Infection Prevention and Control; NA, not applicable; NP, answer not provided/I do not know.
